# Supplementary material for: Methoxy-substituted copper complexes as possible redox mediators in dye-sensitized solar cells
Source: Royal Society of Chemistry journal article supplement (doi:10.1039/d1nj02577e), 2021-01-01
Supplement: d1nj02577e1.pdf [file d1nj02577e1.pdf]

Electronic Supplementary Information - New Journal of Chemistry

## Methoxy-Substituted Copper Complexes as possible Redox Mediators in Dye-Sensitized Solar Cells

M. Giordano,<sup>a</sup> G. Volpi,<sup>a</sup> M. Bonomo,<sup>a</sup> P. Mariani,<sup>b</sup> C. Garino,<sup>a\*</sup> G. Viscardi<sup>a</sup>

<sup>a</sup> *Department of Chemistry, NIS Interdepartmental Centre and INSTM Reference Centre, University of Turin, 10125 Turin, Italy*

<sup>b</sup> *CHOSE and Dept. of Electronic Engineering, University of Rome "Tor Vergata", via del Politecnico 00133 Rome, Italy.*

### Table of contents

|                                                                       |    |
|-----------------------------------------------------------------------|----|
| ESI-MS Spectrum of Electrolyte                                        | S2 |
| Cyclic voltammograms of <b>2a</b> , <b>2b</b> , <b>3a</b> , <b>3b</b> | S3 |

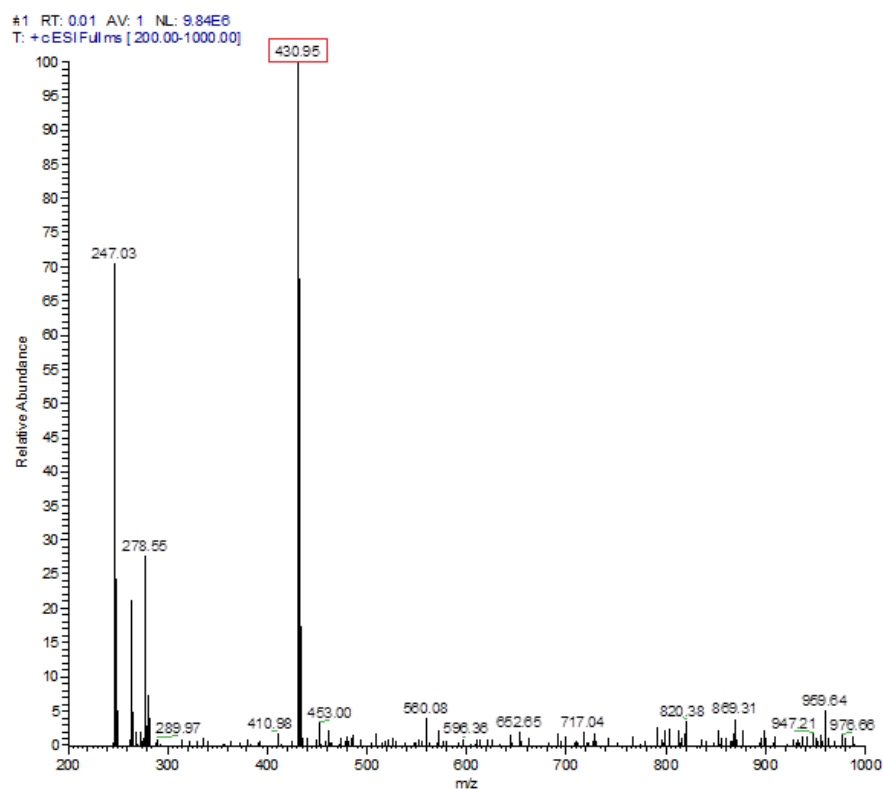

Fig. S1 ESI-MS spectrum of electrolyte solution based on **1a**. The spectrum proves as no coordination equilibria involving the 4-*tert*-butylpyridine are present.

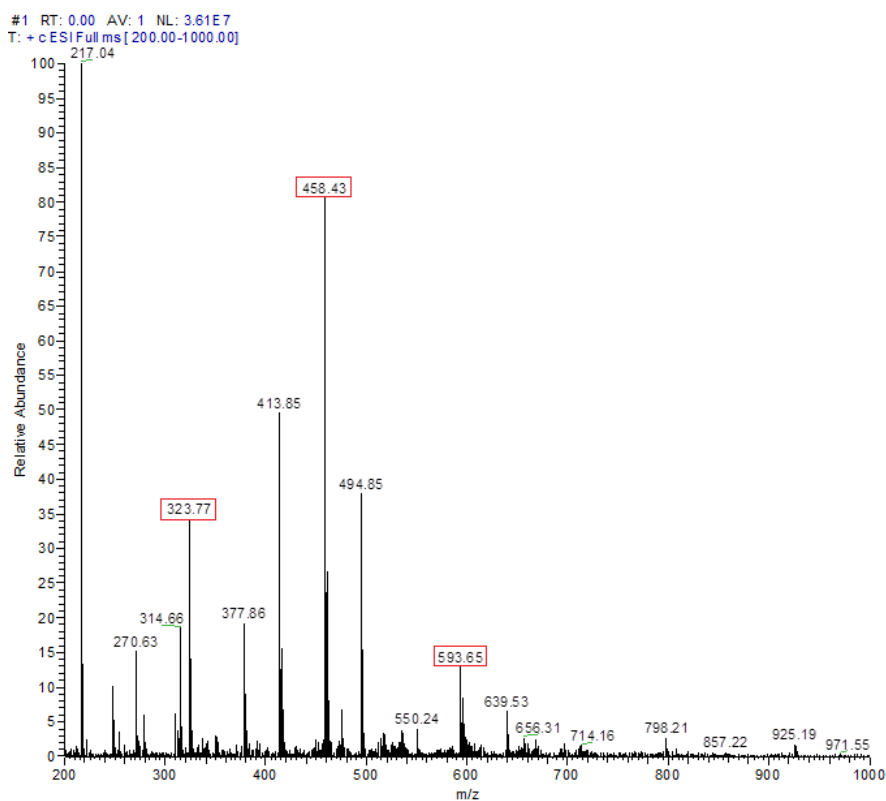

Fig. S2 ESI-MS spectrum of electrolyte solution based on **2a**. In the spectrum we can observe the presence of three signals that prove the coordination equilibria involving the 4-*tert*-butylpyridine (593, 458, 323 m/z).

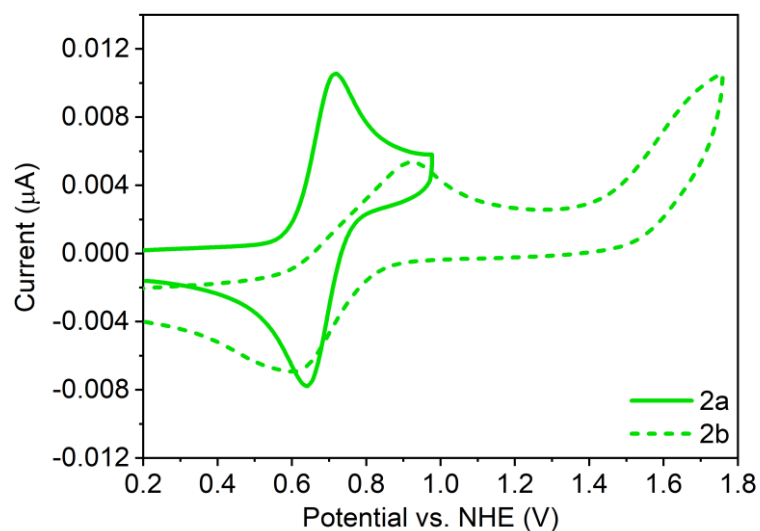

Fig. S3 Cyclic voltammograms of **2a** and **2b**. Measurements have been performed in 0.1 M tetrabutylammonium hexafluorophosphate/dichloromethane. Scan rate 200 mV/s. Potentials are referenced to NHE.

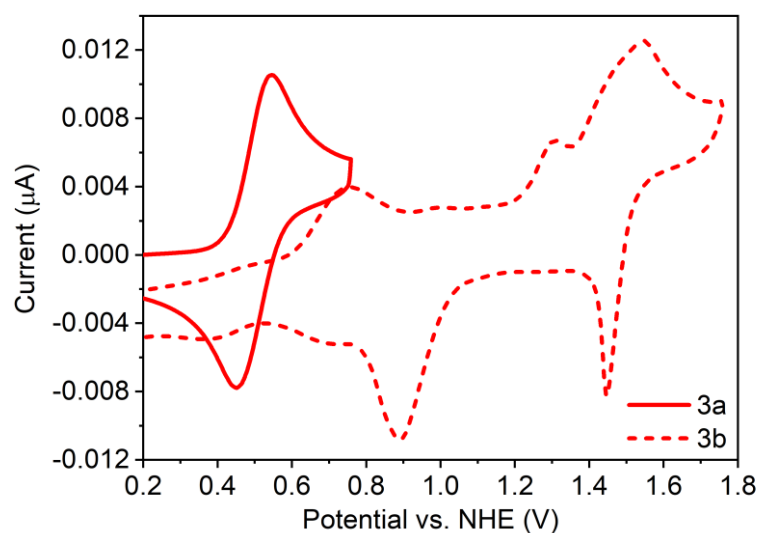

Fig. S4 Cyclic voltammograms of **3a** and **3b**. Measurements have been performed in 0.1 M tetrabutylammonium hexafluorophosphate/dichloromethane. Scan rate 200 mV/s. Potentials are referenced to NHE.
